# Supplementary material
Source: PubMed Central journal article supplement (PMC2658096)
Supplement: M900301200_1.pdf [file M900301200_1.pdf]

## SUPPLEMENTAL DATA

### **An ATP-competitive mTOR inhibitor reveals rapamycin-resistant functions of mTORC1**

Carson C. Thoreen, Seong A. Kang, Jae Won Chang, Qingsong Liu, Jianming Zhang, Yi Gao, Laurie J. Reichling, David M. Sabatini, and Nathanael S. Gray

### **Supplemental Experimental Procedures**

#### *PI3K Invitrogen Adapta Assays*

For lipid kinase assays, 10  $\mu$ L reactions were performed in triplicate with variable amounts of inhibitor with 10  $\mu$ M ATP, 2 mM DTT, and a kinase-specific buffer and substrate. 50  $\mu$ M PIP2:PS lipid kinase substrate was used for p110 $\alpha$ /p85 $\alpha$ , p110 $\beta$ /p85 $\alpha$  and p110 $\gamma$ . 100  $\mu$ M PIP2:PS lipid kinase substrate was used for p110 $\delta$ /p85 $\alpha$ . 100  $\mu$ M PI lipid kinase substrate was used for PI3K-C2 $\alpha$  and PI3K-C2 $\beta$ . 100  $\mu$ M PI:PS lipid kinase substrate was used for hVPS34. The buffer for p110 $\delta$ /p58 $\alpha$ , p110 $\beta$ /p85 $\alpha$ , p110 $\delta$ /p85 $\alpha$ , PI3K-C2 $\alpha$ , and PI3K-C2 $\beta$  was 50 mM Hepes pH 7.5, 3 mM MgCl<sub>2</sub>, 1 mM EGTA, 100 mM NaCl, and 0.03% CHAPS. The buffer for hVPS34 was 50 mM Hepes pH 7.3, 0.1% CHAPS, 1 mM EGTA, and 5 mM MnCl<sub>2</sub>. The enzyme concentrations were 0.12, 4.5, 0.79, 3.5, 6.3, 42, and 2.8 nM for p110 $\alpha$ /p85 $\alpha$ , p110 $\beta$ /p85 $\alpha$ , p110 $\delta$ /p58 $\alpha$ , p110 $\gamma$ , PI3K-C2 $\alpha$ , PI3K-C2 $\beta$ , and hVPS34, respectively. After 1 hour at room temperature, 5  $\mu$ L of detection mix was added, comprised of 12 nM Alexa Fluor647<sup>®</sup> ADP Tracer, 6 nM Adapta<sup>™</sup> Eu-anti-ADP Antibody, 20 mM Tris pH 7.5, 0.01% NP-40, and 30 mM EDTA. After 30 minutes, the plates were read on a Tecan InfiniTE<sup>®</sup> F500 or BMG PHERAstar plate reader. Instrument settings suitable for Adapta<sup>™</sup> assays were used measuring emission at 665 and 615 nm after excitation at 340 nm with a lag time of 100  $\mu$ s and integration time of 200  $\mu$ s. The raw emission ratio (emission at 665 nm  $\div$  emission at 615 nm) values were converted to product formation (% conversion of ATP) using nucleotide (ATP:ADP) standard curves. IC<sub>50</sub> values were calculated from plots of compound concentration versus product formation. mTOR enzyme assays were performed as previously described (1).

## Supplemental Figures

| Kinase ID   | % Ctrl | Kinase ID             | % Ctrl | Kinase ID          | % Ctrl |
|-------------|--------|-----------------------|--------|--------------------|--------|
| AAK1        |        | FGFR3                 |        | PIM3               |        |
| ABL1        |        | FGFR3(G697C)          |        | PIP5K1A            |        |
| ABL1(E255K) |        | FGFR4                 |        | PIP5K2B            |        |
| ABL1(F317I) |        | FGR                   |        | PKAC-alpha         |        |
| ABL1(F317L) |        | FLT1                  | 20     | PKAC-beta          |        |
| ABL1(H396P) |        | FLT3                  |        | PKMYT1             |        |
| ABL1(M351T) |        | FLT3(D835H)           |        | PKN1               |        |
| ABL1(Q252H) |        | FLT3(D835Y)           |        | PKN2               |        |
| ABL1(T315I) | 33     | FLT3(ITD)             |        | PLK1               |        |
| ABL1(Y253F) |        | FLT3(K663Q)           | 29     | PLK3               |        |
| ABL2        |        | FLT3(N841I)           |        | PLK4               |        |
| ACVR1       |        | FLT4                  |        | PRKCD              |        |
| ACVR1B      |        | FRK                   | 26     | PRKCE              |        |
| ACVR2A      |        | FYN                   |        | PRKCH              |        |
| ACVR2B      |        | GAK                   |        | PRKCQ              |        |
| ACVRL1      |        | GCN2(Kin.Dom.2,S808G) |        | PRKD1              |        |
| ADCK3       | 15     | GSK3A                 |        | PRKD2              |        |
| ADCK4       | 23     | GSK3B                 |        | PRKD3              |        |
| AKT1        |        | HCK                   |        | PRKG1              |        |
| AKT2        |        | HIPK1                 |        | PRKG2              |        |
| AKT3        |        | IGF1R                 |        | PRKR               |        |
| ALK         |        | IKK-alpha             |        | PRKX               |        |
| AMPK-alpha1 |        | IKK-beta              |        | PTK2               |        |
| AMPK-alpha2 |        | IKK-epsilon           |        | PTK2B              |        |
| ANKK1       |        | INSR                  |        | PTK6               |        |
| ARK5        |        | INSRR                 |        | RAF1               | 33     |
| AURKA       |        | IRAK3                 |        | RET                |        |
| AURKB       |        | ITK                   |        | RET(M918T)         |        |
| AURKC       |        | JAK1(Kin.Dom.1)       | 27     | RET(V804L)         |        |
| AXL         |        | JAK1(Kin.Dom.2)       |        | RET(V804M)         |        |
| BIKE        |        | JAK2(Kin.Dom.2)       |        | RIOK1              |        |
| BLK         |        | JAK3(Kin.Dom.2)       |        | RIOK2              |        |
| BMPR1A      |        | JNK1                  | 33     | RIOK3              |        |
| BMPR1B      |        | JNK2                  | 33     | RIPK1              | 3      |
| BMPR2       |        | JNK3                  |        | RIPK2              |        |
| BMX         |        | KIT                   |        | RIPK4              |        |
| BRAF        |        | KIT(D816V)            |        | ROCK2              |        |
| BRAF(V600E) |        | KIT(V559D)            |        | ROS1               |        |
| BRSK1       |        | KIT(V559D,T670I)      | 19     | RPS6KA1(Kin.Dom.1) |        |
| BRSK2       |        | KIT(V559D,V654A)      |        | RPS6KA1(Kin.Dom.2) |        |
| BTK         |        | LATS1                 |        | RPS6KA2(Kin.Dom.1) |        |
| CAMK1       |        | LATS2                 |        | RPS6KA2(Kin.Dom.2) |        |
| CAMK1D      |        | LCK                   |        | RPS6KA3(Kin.Dom.1) |        |
| CAMK1G      |        | LIMK1                 |        | RPS6KA4(Kin.Dom.1) |        |
| CAMK2A      |        | LIMK2                 |        | RPS6KA4(Kin.Dom.2) |        |
| CAMK2B      |        | LKB1                  | 15     | RPS6KA5(Kin.Dom.1) |        |

|                    |    |          |     |                    |    |
|--------------------|----|----------|-----|--------------------|----|
| CAMK2D             |    | LOK      | 6.8 | RPS6KA5(Kin.Dom.2) |    |
| CAMK2G             |    | LTK      |     | RPS6KA6(Kin.Dom.1) |    |
| CAMK4              |    | LYN      |     | RPS6KA6(Kin.Dom.2) |    |
| CAMKK1             |    | MAP3K3   |     | SgK085             |    |
| CAMKK2             |    | MAP3K4   |     | SgK110             |    |
| CDC2L1             |    | MAP3K5   |     | SLK                |    |
| CDC2L2             |    | MAP4K1   |     | SNARK              |    |
| CDK11              | 2  | MAP4K2   |     | SNF1LK             |    |
| CDK2               |    | MAP4K3   | 25  | SNF1LK2            | 25 |
| CDK3               |    | MAP4K4   | 15  | SRC                |    |
| CDK5               |    | MAP4K5   | 18  | SRMS               |    |
| CDK7               |    | MAPKAPK2 | 10  | SRPK1              |    |
| CDK8               | 13 | MAPKAPK5 | 16  | SRPK2              |    |
| CDK9               |    | MARK1    |     | SRPK3              |    |
| CDKL2              |    | MARK2    |     | STK16              | 25 |
| CHEK1              |    | MARK3    |     | STK33              |    |
| CHEK2              |    | MARK4    |     | STK35              | 28 |
| CIT                |    | MEK1     |     | STK36              | 18 |
| CLK1               |    | MEK2     |     | SYK                |    |
| CLK2               |    | MEK3     |     | TAK1               |    |
| CLK3               |    | MEK4     |     | TAOK1              |    |
| CLK4               |    | MEK6     |     | TAOK3              |    |
| CSF1R              |    | MELK     |     | TEC                |    |
| CSK                |    | MERTK    |     | TESK1              |    |
| CSNK1A1L           |    | MET      |     | TGFBR1             |    |
| CSNK1D             |    | MINK     |     | TGFBR2             |    |
| CSNK1E             |    | MKNK1    |     | TIE1               |    |
| CSNK1G1            |    | MKNK2    |     | TIE2               | 25 |
| CSNK1G2            |    | MLCK     |     | TLK1               |    |
| CSNK1G3            |    | MLK1     |     | TLK2               |    |
| CSNK2A1            |    | MLK2     |     | TNIK               |    |
| CSNK2A2            |    | MLK3     |     | TNK1               | 15 |
| DAPK1              |    | MRCKA    | 0.8 | TNK2               |    |
| DAPK2              |    | MRCKB    | 6.6 | TNNI3K             |    |
| DAPK3              |    | MST1     | 24  | TRKA               |    |
| DCAMKL1            |    | MST1R    |     | TRKB               |    |
| DCAMKL2            |    | MST2     |     | TRKC               |    |
| DCAMKL3            |    | MST3     |     | TSSK1              |    |
| DDR1               |    | MST4     |     | TTK                | 30 |
| DDR2               |    | MUSK     |     | TXK                |    |
| DLK                |    | MYLK     |     | TYK2(Kin.Dom.1)    |    |
| DMPK               |    | MYLK2    |     | TYK2(Kin.Dom.2)    |    |
| DMPK2              | 3  | MYO3A    |     | TYRO3              |    |
| DRAK1              |    | MYO3B    |     | ULK1               |    |
| DRAK2              |    | NDR2     |     | ULK2               |    |
| DYRK1B             |    | NEK1     |     | ULK3               |    |
| EGFR               |    | NEK2     |     | VEGFR2             |    |
| EGFR(E746-A750del) |    | NEK5     | 11  | WEE1               |    |
| EGFR(G719C)        |    | NEK6     |     | WEE2               |    |
| EGFR(G719S)        |    | NEK7     |     | YANK2              |    |
| EGFR(L747-E749del, |    | NEK9     |     | YANK3              |    |

|                              |     |               |      |       |    |
|------------------------------|-----|---------------|------|-------|----|
| A750P)                       |     | NLK           |      | YES   |    |
| EGFR(L747-S752del,<br>P753S) |     |               |      | YSK1  |    |
| EGFR(L747-<br>T751del,Sins)  |     | p38-alpha     |      | ZAK   | 23 |
| EGFR(L858R)                  |     | p38-beta      |      | ZAP70 |    |
| EGFR(L861Q)                  |     | p38-delta     |      |       |    |
| EGFR(S752-I759del)           |     | p38-gamma     |      |       |    |
| EPHA1                        |     | PAK1          |      |       |    |
| EPHA2                        |     | PAK2          |      |       |    |
| EPHA3                        |     | PAK3          |      |       |    |
| EPHA4                        |     | PAK4          |      |       |    |
| EPHA5                        |     | PAK6          |      |       |    |
| EPHA6                        |     | PAK7/PAK5     |      |       |    |
| EPHA7                        |     | PCK1          |      |       |    |
| EPHA8                        |     | PCK2          |      |       |    |
| EPHB1                        |     | PCK3          |      |       |    |
| EPHB2                        |     | PDGFRA        |      |       |    |
| EPHB3                        |     | PDGFRB        |      |       |    |
| EPHB4                        |     | PDPK1         |      |       |    |
| ERBB2                        |     | PFTAIRE2      |      |       |    |
| ERBB4                        |     | PFTK1         |      |       |    |
| ERK1                         |     | PHKG1         |      |       |    |
| ERK2                         |     | PHKG2         |      |       |    |
| ERK3                         |     | PIK3C2B       | 26   |       |    |
| ERK4                         |     | PIK3CA        | 1.5  |       |    |
| ERK5                         | 6.4 | PIK3CA(E545K) | 0.65 |       |    |
| ERK8                         |     | PIK3CB        | 28   |       |    |
| FER                          |     | PIK3CD        |      |       |    |
| FES                          |     | PIK3CG        | 34   |       |    |
| FGFR1                        |     | PIM1          |      |       |    |
| FGFR2                        | 25  | PIM2          |      |       |    |

### Figure S1. Torin1 has negligible off-target activity against a diverse panel of kinases

Torin1 was profiled at a concentration of 10  $\mu$ M against a diverse panel of 353 kinases by Ambit Biosystems. Scores for primary screen hits are reported as a percent of the DMSO control (% Control). For kinases where no score is shown, no measurable binding was detected. The lower the score, the lower the Kd is likely to be such that scores of zero represent strong hits. Scores are related to the probability of a hit but are not strictly an affinity measurement. At a screening concentration of 10  $\mu$ M, a score of less than 10% implies that the false positive probability is less than 20% and the Kd is most likely less than 1  $\mu$ M. A score between 1- 10% implies that the false positive probability is less than 10%, though it is difficult to assign a quantitative affinity from a single-point primary screen. A score of less than 1% implies that the false positive probability is less than 5% and the Kd is most likely less than 1  $\mu$ M.

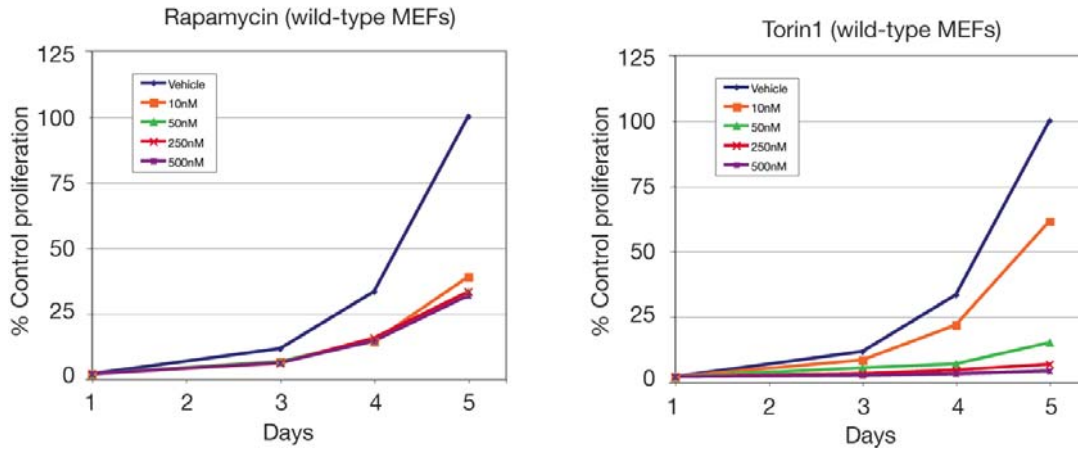

**Figure S2. Torin1 and rapamycin differentially affect cell growth at equal concentrations**

mTOR inhibition by Torin1 but not rapamycin prevents the proliferation of wild-type MEFs. MEF ( $p53^{-/-}$ ) cells were grown in the presence of vehicle, or 10 nM, 50 nM, 250 nM or 500 nM rapamycin or Torin1 for 4 days. Cell proliferation was measured in triplicate at indicated time-points using the CellTiterGlo viability assay.

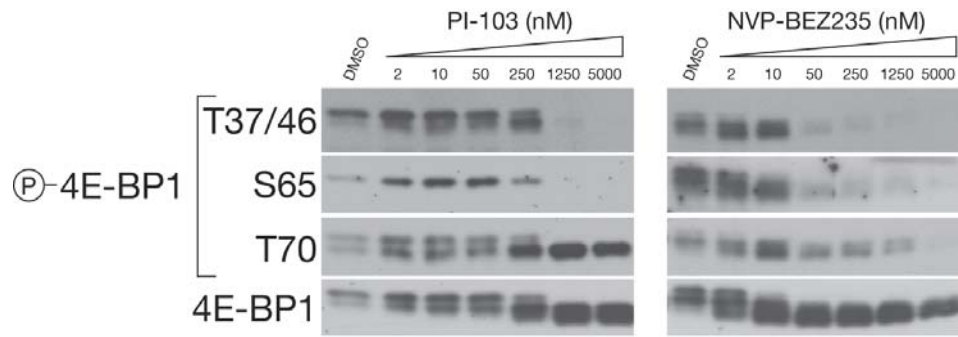

**Figure S3. Dual-mTOR/PI3K inhibitors prevent phosphorylation of Torin1-sensitive 4E-BP1 sites**

MEFs ( $p53^{-/-}$ ) were treated with increasing concentrations of the dual-mTOR/PI3K inhibitors PI-103 or BEZ-235 for 1 h and then analyzed by immunoblotting for the indicated proteins and phosphorylation states.

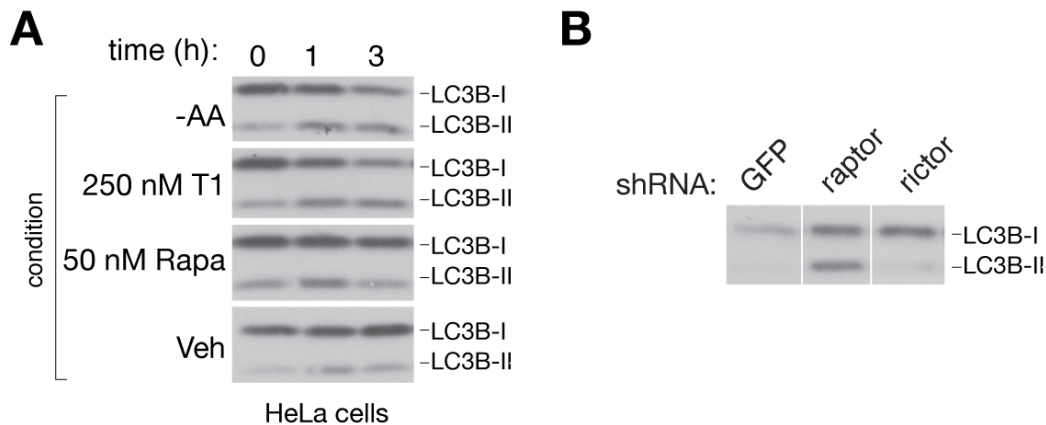

**Figure S4. mTORC1 inhibition promotes autophagy**

(A) Amino acid starvation and Torin1 induce autophagy in HeLa cells. HeLa cells were treated with vehicle (DMSO), 50 nM rapamycin, 250 nM Torin1 or grown in amino acid-free conditions for 0, 1, or 3 hours. Cells were lysed at the indicated time points and analyzed by immunoblotting.

(B) Selective inactivation of mTORC1 using RNAi promotes LC3 degradation. MEFs (p53<sup>-/-</sup>) were infected with lentivirus expressing either control, raptor- or rictor-specific shRNAs and grown for 4 days. Cell lysates were then analyzed by immunoblot using antibodies specific LC3B.

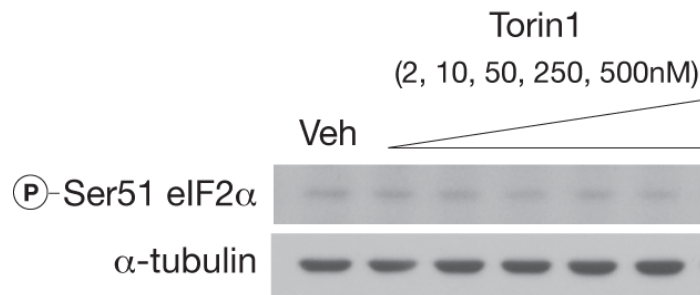

**Figure S5. mTOR inhibition does not affect eIF2 alpha phosphorylation.**

MEFs (p53<sup>-/-</sup>) were treated with vehicle (DMSO) or increasing concentrations of Torin1 for 1 h and then analyzed by immunoblotting for the indicated proteins and phosphorylation states.

## Supplemental References

1. Reichling, L. J., Lebakken, C. S., Riddle, S. M., Vedvik, K. L., Robers, M. B., Kopp, L. M., Bruinsma, R., and Vogel, K. W. (2008) *J Biomol Screen* **13**, 238-244
